# Supplementary material for: Nano-hydroxyapatite promotes self-assembly of honeycomb pores in poly(l-lactide) films through breath-figure method and MC3T3-E1 cell functions
Source: Royal Society of Chemistry journal article supplement (doi:10.1039/c4ra13843k), 2014-12-17
Supplement: c4ra13843k1.pdf [file c4ra13843k1.pdf]

Supplementary Information

# **Nano-hydroxyapatite Promotes Self-assembly of Honeycomb Pores in poly(L-lactide) Films Through Breath-Figure Method and MC3T3-E1 cell functions**

X. H. Wu,<sup>a</sup> Z. Y. Wu<sup>b</sup>, J. C. Su<sup>c\*</sup>, Y.G. Yan<sup>d</sup>, B.Q. Yu<sup>e</sup>, J. Wei<sup>b</sup> and L.M. Zhao<sup>b\*</sup>

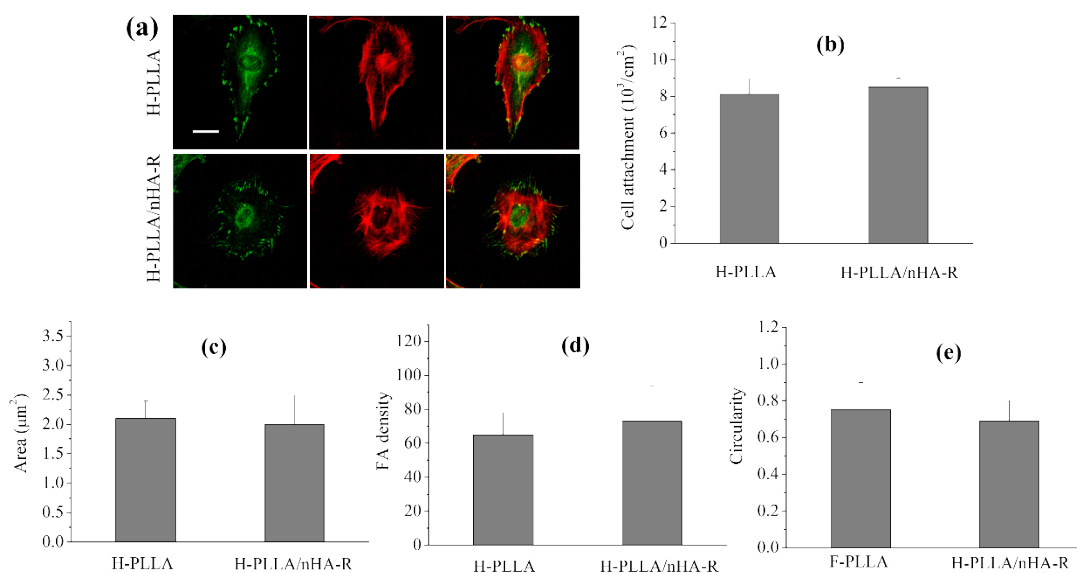

**Figure S1.** (a) Vinculin-stained FAs (green, left column), RP-stained cytoskeleton (red, middle column), and merged images (right column) at day 1 postseeding. Scale bar of 20 μm is applicable to all. (b) Cell attachment represented by cell numbers determined by MTT assay at 4 h. (c) FA area. (d) FA density. (e) FA circularity quantified from vinculin-stained FAs using ImageJ software.

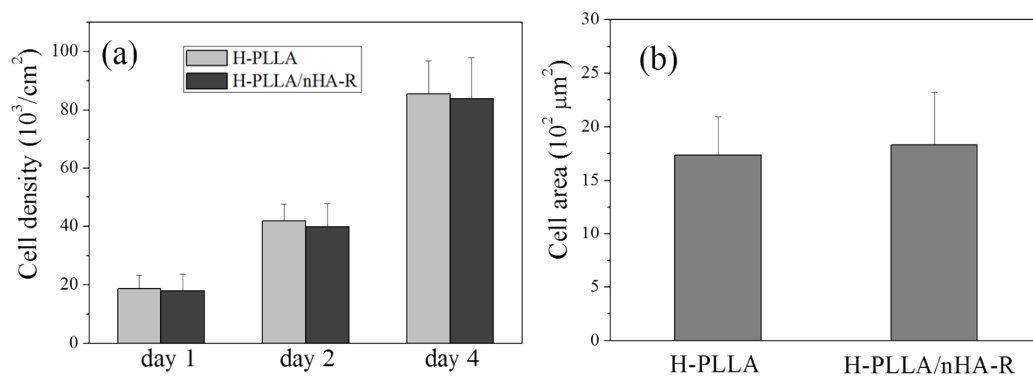

**Figure S2.** (a) Cell proliferation on the H-PLLA and H-PLLA/nHA-R films represented by the cell numbers determined by MTT assay at day 1, 2, and 4. (b) Cell area on the H-PLLA and H-PLLA/nHA-R films at day 1 post seeding.

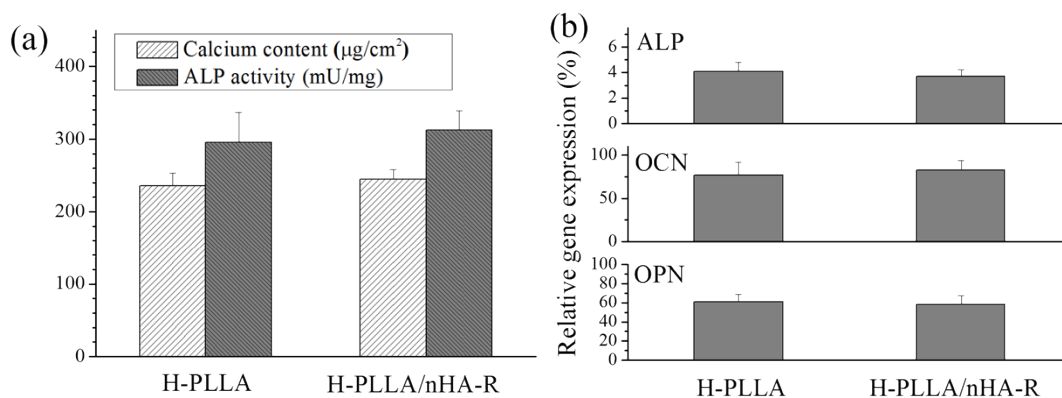

**Figure S3.** (a) ALP activity and calcium content of MC3T3-E1 cells cultured on H-PLLA and H-PLLA/nHA-R films for 14 days. (b) Gene expression levels of ALP, OCN, and OPN relative to GAPDH in MC3T3-E1 cells at day 14 post seeding on H-PLLA and H-PLLA/nHA-R films.
